# Supplementary material for: Improve the quality and coverage of National Cervical Cancer Screening programme by exploring healthcare workers' acceptability, relevance, simplicity and barriers for new HPV/DNA test in a district of Sri Lanka: A cross sectional qualitative study
Source: Research Square preprint supplement (doi:10.21203/rs.3.rs-5714124/v1), 2025-03-18
Supplement: Supplementary file 1 [file 274cb15438cfc9b57ea2db7b.docx]

**Key Informant Interviews (KII)-Interviewers Guide**

**The objective of the KII**

- To explore the perception of cervical cancer screening programme in Sri Lanka among health care workers/service providers in Kalutara district.

**Introduction**

Introduce yourself. Welcome the participant and show your gratitude for his/her participation

……………………………………………………………………………………………….…………………………………………………………………………………………….

……………………………………………………………………………………………

This interview is held to gather your views and perceptions on the cervical cancer screening programme in Sri Lanka and its strengths and weaknesses.

Communicate objectives with participants and provide information sheets to them.

“I would like to obtain your permission to take notes during discussion to ensure none of your ideas or points are missed.

Confidentiality of participants will be ensured by not including any identification details and the information gathered will be kept in a confidential manner. The approximate time duration will be thirty minutes.

**Questions for healthcare workers**

An interviewer should attempt to cover all the listed questions. But it is not strictly necessary, questions do not have to be asked in the stated order. Treat questions as a means to initiate and continue the flow of conversation in the correct direction. Initiate the conversation by asking for a round of self-introduction

Initiate the conversation by asking for a round of self-introduction

1. What do you understand about methods of cervical cancer screening?

2. Is it important? If so why?

3. What do you think about the cervical cancer screening programme in Sri Lanka?

4. What are the existing problems in the cervical cancer screening programme in Sri Lanka?

5. What is the turning point towards achieving good coverage in future?

6. What are the strengths of the present cervical cancer screening programme in Sri Lanka?

7. What are the weaknesses of the present cervical cancer screening programme in Sri Lanka?

8. What do you think about HPV/DNA screening test as a cervical cancer screening method?

9. What do you understand HPV/DNA vaginal specimen collection, as a cervical cancer screening method?

10. What are your suggestions to improve the cervical cancer screening programme in Sri Lanka?

11. Was this an appropriate summary?

12. Did you forget something?

If no more information is being produced, end the interview

Summarize the data collected to the participant. Ask her/him if all information has been stated and whether there is any more information to be added.

At the end, thank all participants for his/her valuable ideas and time
