# Supplementary material for: Improve the quality and coverage of National Cervical Cancer Screening programme by exploring healthcare workers' acceptability, relevance, simplicity and barriers for new HPV/DNA test in a district of Sri Lanka: A cross sectional qualitative study
Source: Research Square preprint supplement (doi:10.21203/rs.3.rs-5714124/v1), 2025-03-18
Supplement: Supplementary file 2 [file 40c4b638cd7506b6d3f25aef.docx]

**Focus Group Discussion-Moderator Guide**

**Objectives of the Focus Group discussion**

- To explore the perception of the cervical cancer screening programme in Sri Lanka among PHMM from different sectors in Kalutara district.
- To explore the perception of cervical cancer screening programme in Sri Lanka among PHMM from different service duration in field in Kalutara district.

**Introduction**

Introduce the moderator and note-taker. Welcome the participant and show your gratitude for his/her participation

………………………………………………………………………………………………………………………………………………………………………………………………

………………………………………………………………………………………………

This interview is held to gather your views and perceptions on the cervical cancer screening programme in Sri Lanka, its strengths and weaknesses.

Communicate objectives with participants and provide information sheets to them.

“I would like to obtain your permission to take down notes, while during the discussion and record the session using an audio recorder to make sure none of your ideas or points are missed.

Participation in the discussion is voluntary. Confidentiality of participants will be ensured by not including any identification details and the information gathered will be kept secret. Audio tapes will be erased after completion of notes. The approximate time duration will be one hour.

Refreshments are available for all participants at the end of the discussion. Bathroom facilities are available at the………………………… You may go to the bathroom even during the middle of the discussion.

Ground rules for the discussion

- There is no right for wrong answer to questions. Everyone’s ideas are important.
- This is an inter-reactive session. All participants should contribute to the discussion. Do not wait till you are called up
- Participants should feel free to disagree with each other
- Let one person speak at a time

**Questions for Public Health Midwives**

The facilitator should attempt to cover all listed questions. But it is not strictly necessary. Questions do not have to be asked in the stated order. Treat the questions as a means to initiate and continue the flow of conversation in the correct direction.

Initiate the conversation by asking for a round of self-introduction

1. What do you understand about methods of cervical cancer screening?

2. Is it important? If so why?

3. What do you think about the cervical cancer screening programme in Sri Lanka?

4. What are the existing problems in the cervical cancer screening programme in Sri Lanka?

5. What is the turning point towards achieving good coverage in future?

6. What are the strengths of the present cervical cancer screening programme in Sri Lanka?

7. What are the weaknesses of the present cervical cancer screening programme in Sri Lanka?

8. What do you think about HPV/DNA screening test as a cervical cancer screening method?

9. What do you understand HPV/DNA vaginal specimen collection, as a cervical cancer screening method?

10. What are your suggestions to improve the cervical cancer screening programme in Sri Lanka?

11. Was this an appropriate summary?

12. Did you forget something?

If no more information is being produced, end the interview.

Ask the note taker to summarize the data collected to the participants. Ask participants if all information has been stated and whether there is any more information to be added.

At the end, thank all participants for his/her valuable ideas and time.

Provide refreshments.
