# Supplementary material for: Improve the quality and coverage of National Cervical Cancer Screening programme by exploring healthcare workers' acceptability, relevance, simplicity and barriers for new HPV/DNA test in a district of Sri Lanka: A cross sectional qualitative study
Source: Research Square preprint supplement (doi:10.21203/rs.3.rs-5714124/v1), 2025-03-18
Supplement: Supplementary file 3 [file 852b6204c86d74afd3f9a566.docx]

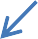


Yearly cytology X 3 yrs

Biopsy & Rx

Positive

HPV Test at 12

Negative

Positive

Negative

Colposcopy

Negative

Algorithm of Asia Oceania Guidelines for the Implementation of Programs for Cervical Cancer Prevention and Control for HPV/ DNA Screen Positive Follow-up by Hextan et al. (2011)

Negative

HPV/DNA Test

Positive

Cytology

Positive (ASCUS-Low/High grade;

SIL- Low/High grade)

Screening after 10 yrs or no further screening if women≥45
