# Supplementary material for: Improve the quality and coverage of National Cervical Cancer Screening programme by exploring healthcare workers' acceptability, relevance, simplicity and barriers for new HPV/DNA test in a district of Sri Lanka: A cross sectional qualitative study
Source: Research Square preprint supplement (doi:10.21203/rs.3.rs-5714124/v1), 2025-03-18
Supplement: Supplementary file 4 [file 936139e29b14f0b0307a6779.docx]

**Guideline for HPV/DNA cervical specimen collection for health staff**

1. Client should lay on the bed at lithotomy position same the way laid on to the pap smear collection
2. Insert the Cusco’s speculum according to the guideline by Gamage et al., 2012.
3. **E**xcessive secretions are collected from the un cleaned cervix using a swab
4. Insert central bristles of the broom into the cervical canal. Allow shorter bristles to fully contact the ecto-cervix.
5. Gently collect cervical smear from the squamo-columnar junction of the cervix using the broom- like device, by rotating 5 times in a clockwise direction.
6. Gently remove the broom-like device and place in the provided container with cell collection media/thinprep solution/LBC.
7. Push the broom-like device against the bottom of the vial 10 times forcing the bristles to bend apart. Swirl the broom vigorously after pushing.
8. Tighten the vial cap until the black torque line passes the black line on the vial.
9. Barcode container with accurate identification number/WWC register number.
10. Transport to the laboratory at room temperature in a provided regiform box with ice packs as soon as possible. In delay of transport, specimens to be sorted at the bottom level of a normal refrigerator (2c-8c).
