# Supplementary material for: Improve the quality and coverage of National Cervical Cancer Screening programme by exploring healthcare workers' acceptability, relevance, simplicity and barriers for new HPV/DNA test in a district of Sri Lanka: A cross sectional qualitative study
Source: Research Square preprint supplement (doi:10.21203/rs.3.rs-5714124/v1), 2025-03-18
Supplement: Supplementary file 5 [file c8da05d29d75ced6b80d6a6c.docx]

**Guideline for HPV/DNA Vaginal Specimen Collection**

1.Client should lay on the bed at lithotomy position same the way laid on to the pap smear collection.

2. Insert broom-like device deep into the vagina, until it meet resistance

3. Gently collect vaginal smear from the upper vagina using the broom- like device, by rotating 5 times in a clockwise direction.

5.Gently remove the broom-like device and place in the provided container with cell collection media/thin-prep solution.

6.Push the broom-like device against the bottom of the vial 10 times forcing the bristles to bend apart. Swirl the broom vigorously after pushing.

7.Tighten the vial cap until the black torque line passes the black line on the vial.

8.Barcode container with accurate identification number/WWC register number and indicating “V” to identify vaginal specimen (Identification number should be similar with the same client’s cervical specimen number).

9.Transport to the laboratory at room temperature in a provided regiform box with ice packs as soon as possible. In delay of transport, specimens to be sorted at the bottom level of a normal refrigerator (2c°-8c⁰).
